# Supplementary material for: Tsunami Detection by GPS-derived Ionospheric Total Electron Content
Source: Research Square preprint supplement (doi:10.21203/rs.3.rs-118976/v1), 2020-12-09
Supplement: Supplementary file 1 [file e347c1b11ad5eff3e8004aff.docx]

**Supplementary Information**

**Tsunami detection by GPS-derived ionospheric total electron content**

### Mahesh N Shrivastava1,2*, Ajeet K Maurya3, Gabriel Gonzalez1,2, P S Sunil4, Juan Gonzalez2,5, Pablo Salazar1,2, and Rafael Aranguiz2,5

1Department of Geological Sciences, Universidad Catolica del Norte, Antofagasta, Chile

2National Research Center for Integrated Natural Disaster Management, Santiago, Chile

3Department of Physics, Doon University, Dehradun, India

4Department of Marine Geology and Geophysics, Cochin University of Science and Technology, Kochi, India

5Department of Civil Engineering, Universidad Catolica de la Santísima Concepcion, Chile

*E-mail: [mahesh.shrivastava@ucn.cl](mailto:mahesh.shrivastava@ucn.cl)

**Contents of this file**

Table S1 to S3

Figure S1 to S4

**Supplementary Table S1**. GPS sites in Pisagua and Illapel Earthquake region

| **Pisagua**  **Earthquake** | | | | **Illapel**  **Earthquake** | | | |
| --- | --- | --- | --- | --- | --- | --- | --- |
| **S/N** | **GPS sites** | **Latitude**  **(Degree)** | **Longitude**  **(Degree)** | **S/N** | **GPS**  **sites** | **Latitude**  **(Degree)** | **Longitude**  **(Degree)** |
| 1 | GLRV | -14.670 | -74.404 | 1 | CHYT | -18.370 | -70.342 |
| 2 | NZCA | -14.856 | -74.964 | 2 | UTAR | -18.375 | -70.296 |
| 3 | SJUA | -15.363 | -75.188 | 3 | PB08 | -20.143 | -69.161 |
| 4 | ATIC | -16.231 | -73.697 | 4 | AEDA | -20.546 | -70.177 |
| 5 | CRBR | -16.996 | -71.790 | 5 | PB01 | -20.898 | -69.470 |
| 6 | TQPL | -17.304 | -70.643 | 6 | CRSC | -20.917 | -70.079 |
| 7 | PTCL | -17.701 | -71.370 | 7 | PB02 | -21.044 | -69.487 |
| 8 | LYAR | -18.134 | -70.569 | 8 | PB07 | -21.577 | -69.869 |
| 9 | PTRE | -18.194 | -69.574 | 9 | PB03 | -21.898 | -69.734 |
| 10 | PCCL | -18.325 | -70.089 | 10 | RADO | -22.082 | -68.926 |
| 11 | UTAR | -18.375 | -70.296 | 11 | PB04 | -22.183 | -70.132 |
| 12 | ATJN | -19.164 | -70.119 | 12 | PB06 | -22.552 | -69.555 |
| 13 | COLC | -19.276 | -68.639 | 13 | PB05 | -22.698 | -70.185 |
| 14 | PB11 | -19.622 | -69.648 | 14 | PMEJ | -22.945 | -70.431 |
| 15 | CHM2 | -19.669 | -69.194 | 15 | SPAT | -22.952 | -68.178 |
| 16 | PCHA | -19.869 | -69.432 | 16 | JRGN | -23.288 | -70.574 |
| 17 | CGTC | -20.035 | -70.052 | 17 | PRNL | -24.604 | -70.384 |
| 18 | PB08 | -20.143 | -69.161 | 18 | PAZU | -25.996 | -70.599 |
| 19 | IQQE | -20.273 | -70.131 | 19 | MRCG | -26.835 | -69.130 |
| 20 | AEDA | -20.403 | -70.178 | 20 | UDAT | -27.357 | -70.354 |
| 21 | PB01 | -20.898 | -69.470 | 21 | TAMR | -27.436 | -70.235 |
| 22 | PB02 | -21.044 | -69.487 | 22 | TRST | -28.836 | -70.273 |
| 23 | PB07 | -21.577 | -69.869 | 23 | CRZL | -29.101 | -71.409 |
| 24 | PB03 | -21.898 | -69.734 | 24 | LSCH | -29.742 | -71.246 |
| 25 | PB04 | -22.183 | -70.132 | 25 | TOLO | -30.003 | -70.806 |
| 26 | PB06 | -22.552 | -69.555 | 26 | PFRJ | -30.506 | -71.635 |
| 27 | PB05 | -22.698 | -70.185 | 27 | OVLL | -30.603 | -71.203 |
| 28 | CBAA | -22.746 | -68.448 | 28 | PEDR | -30.670 | -70.689 |
| 29 | PMEJ | -22.945 | -70.431 | 29 | CMBA | -31.018 | -70.999 |
| 30 | VLZL | -23.110 | -69.960 | 30 | SLMC | -31.605 | -70.963 |
| 31 | JRGN | -23.280 | -70.570 | 31 | LVIL | -31.737 | -71.514 |
| 32 | UCNF | -23.520 | -70.392 | 32 | ZAPA | -32.378 | -71.466 |
| 33 | CGUA | -24.997 | -69.573 | 33 | RCSD | -33.477 | -71.613 |
|  | | | | 34 | UAIB | -33.493 | -70.509 |
| 35 | TLGT | -33.599 | -70.989 |
| 36 | ARJF | -33.628 | -78.836 |
| 37 | NAVI | -33.952 | -71.824 |
| 38 | PCMU | -34.317 | -71.961 |
| 39 | SBLL | -34.792 | -70.780 |
| 40 | PELL | -35.645 | -72.606 |
| 41 | QLAP | -36.084 | -72.125 |
| 42 | CLL1 | -36.411 | -72.080 |

**Supplementary Table S2.** Summary of arrival times and maximum wave height of tsunami associated to the Pisagua Mw 8.1 and Illapel Mw 8.3 earthquake.

| **Pisagua**  **Earthquake** | | | | | **Illapel**  **Earthquake** | | | | |
| --- | --- | --- | --- | --- | --- | --- | --- | --- | --- |
| **S/N** | **Tide gauge station** | **Arrival time [min]** | **Max. wave height [m]** | **Max. wave time [min]** | **S/N** | **Tide gauge station** | **Arrival time [min]** | **Max.**  **wave height [m]** | **Max. wave time [min]** |
| 1 | MATA | 36.59 | 0.62 | 104.80 | 1 | CHAN | 54.64 | 1.06 | 126.80 |
| 2 | ARIC | 29.07 | 1.96 | 89.20 | 2 | CALD | 44.34 | 1.05 | 524.61 |
| 3 | PISA | 11.08 | 2.19 | 79.03 | 3 | HUAS | 30.19 | 0.65 | 126.86 |
| 4 | IQUI | 18.19 | 1.83 | 138.31 | 4 | COQU | 22.99 | 4.69 | 90.87 |
| 5 | PATA | 20.64 | 1.69 | 30.24 | 5 | PICH | 13.70 | 1.75 | 21.77 |
| 6 | TOCO | 34.86 | 0.89 | 261.38 | 6 | QUIN | 23.28 | 1.74 | 71.08 |
| 7 | MEJI | 39.20 | 0.86 | 449.63 | 7 | VALP | 24.49 | 1.68 | 107.83 |
|  | | | | | 8 | SANO | 31.19 | 0.98 | 93.86 |
| 9 | BUCA | 42.22 | 0.72 | 335.12 |
| 10 | CONS | 55.31 | 1.24 | 191.29 |

**Supplementary Table S3.** Summary of arrival times and maximum wave height of tsunami associated to the Pisagua Mw 8.1 and Illapel Mw 8.3 earthquake.

|  | **Station Network** | **Lat. [o]** | **Long. [o]** | **Distance [°]** | **Azimuth [°]** | **Elevation (MSL)** | **Location** |
| --- | --- | --- | --- | --- | --- | --- | --- |
| PI SA  GUA | TEIG IU | 20.23 | -88.28 | 43.37 | -24.24 | 40 | Yucatan, Mexico |
| HOPE II | -54.28 | -36.49 | 43.38 | 151.38 | 20 | South Georgia Island |
| Ill  AP  EL | OTAV IU | 0.24 | -78.45 | 32.45 | -12.70 | 3510 | Ecuador |
| PMSA IU | -64.77 | -64.05 | 33.54 | 174.12 | 40 | Antarctic |


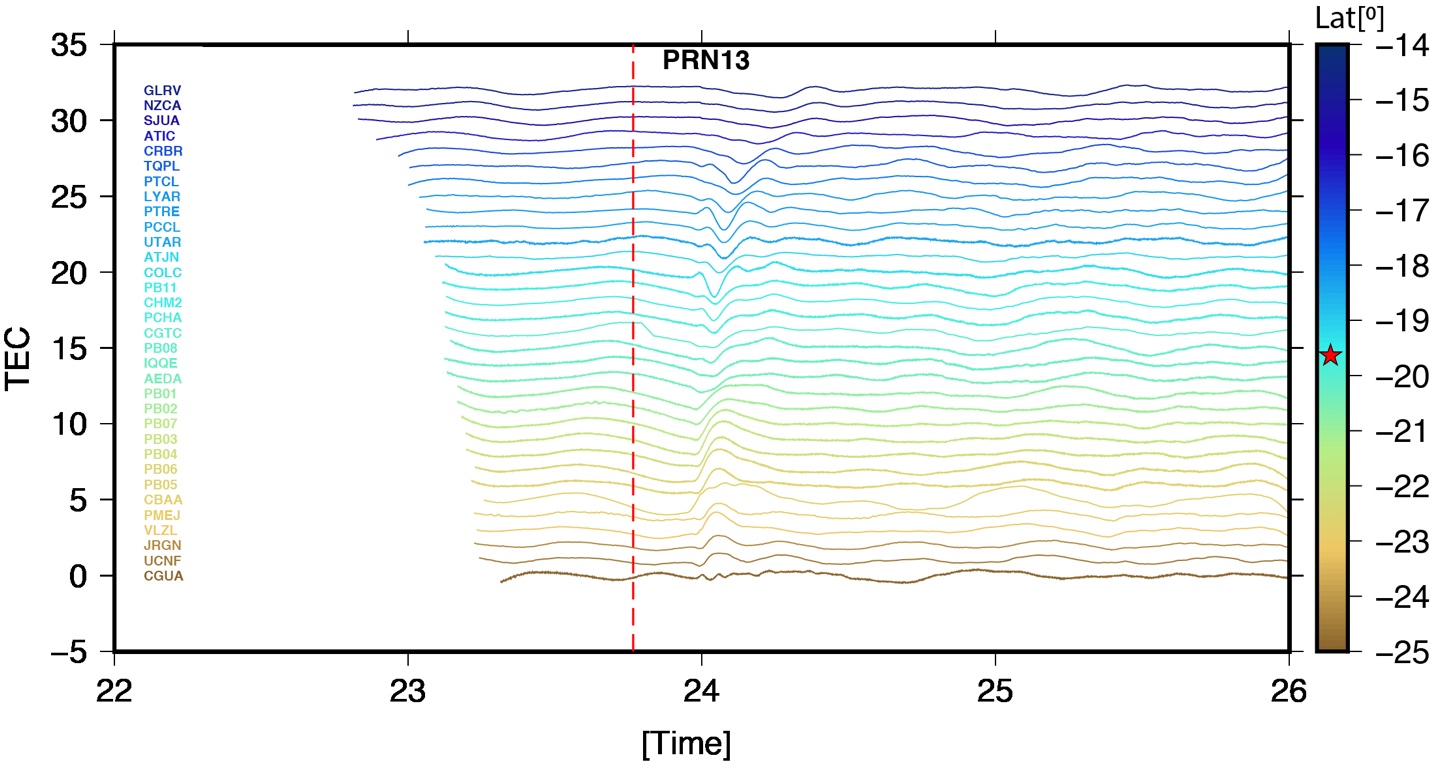


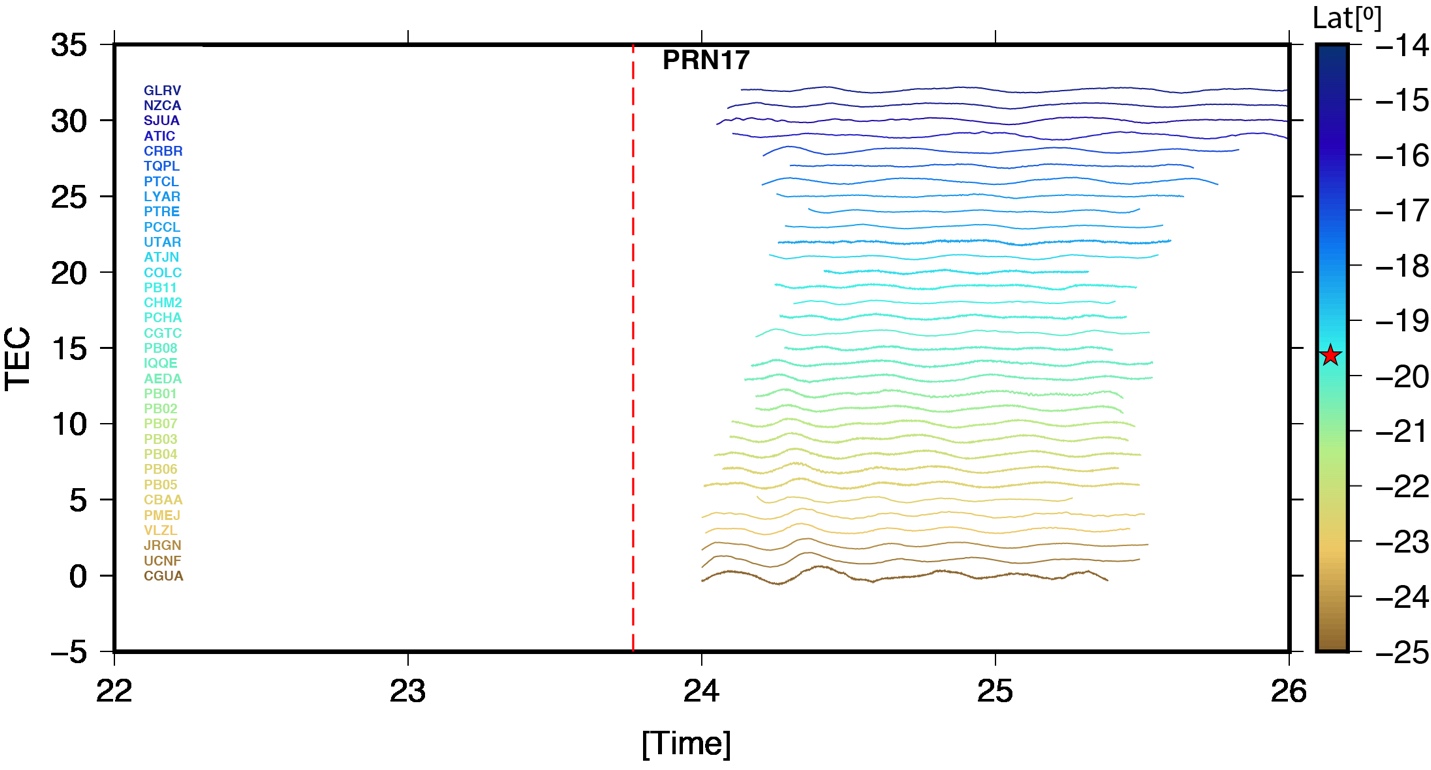


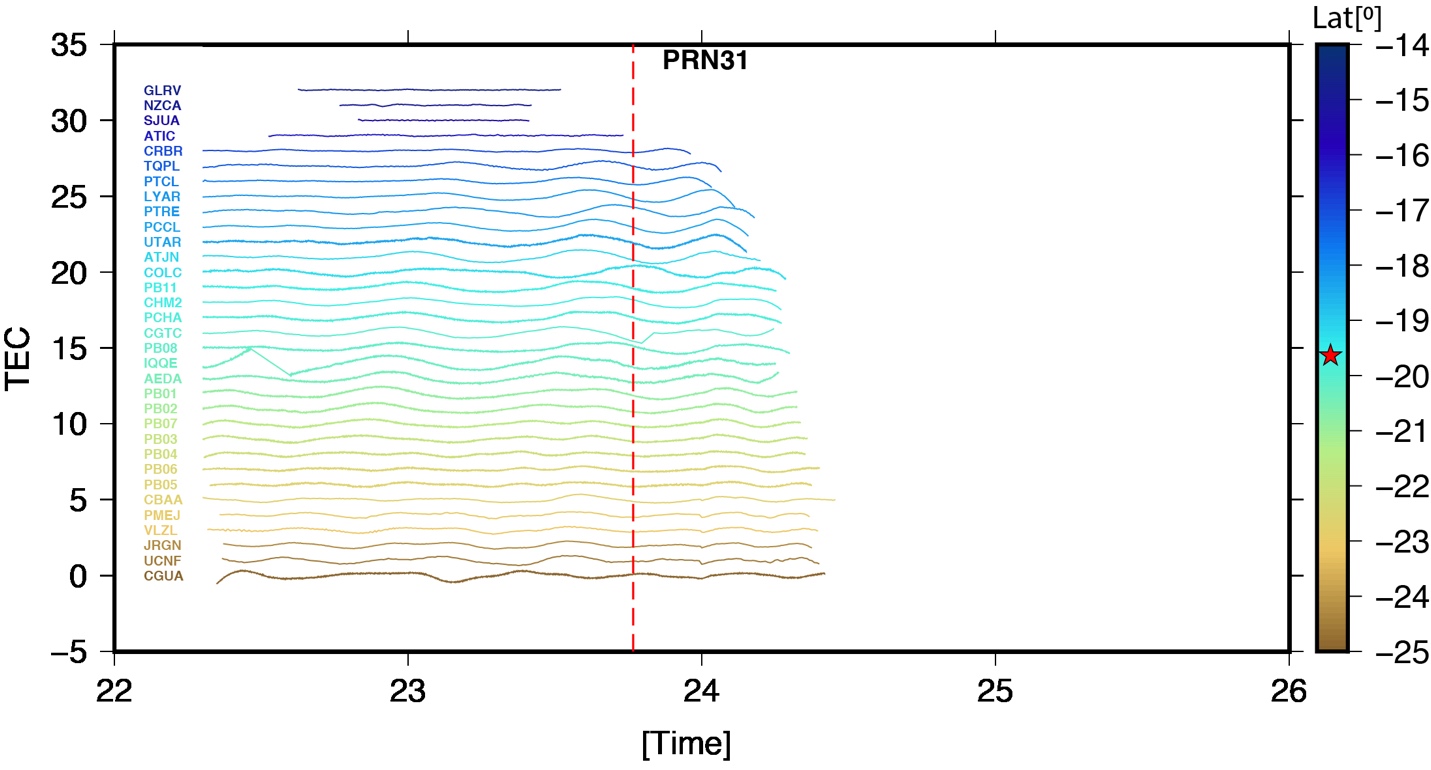


**Supplementary Figure S1.** VTEC of the Pisagua region of PRN 13, 17, 31 in the low elevation angle.


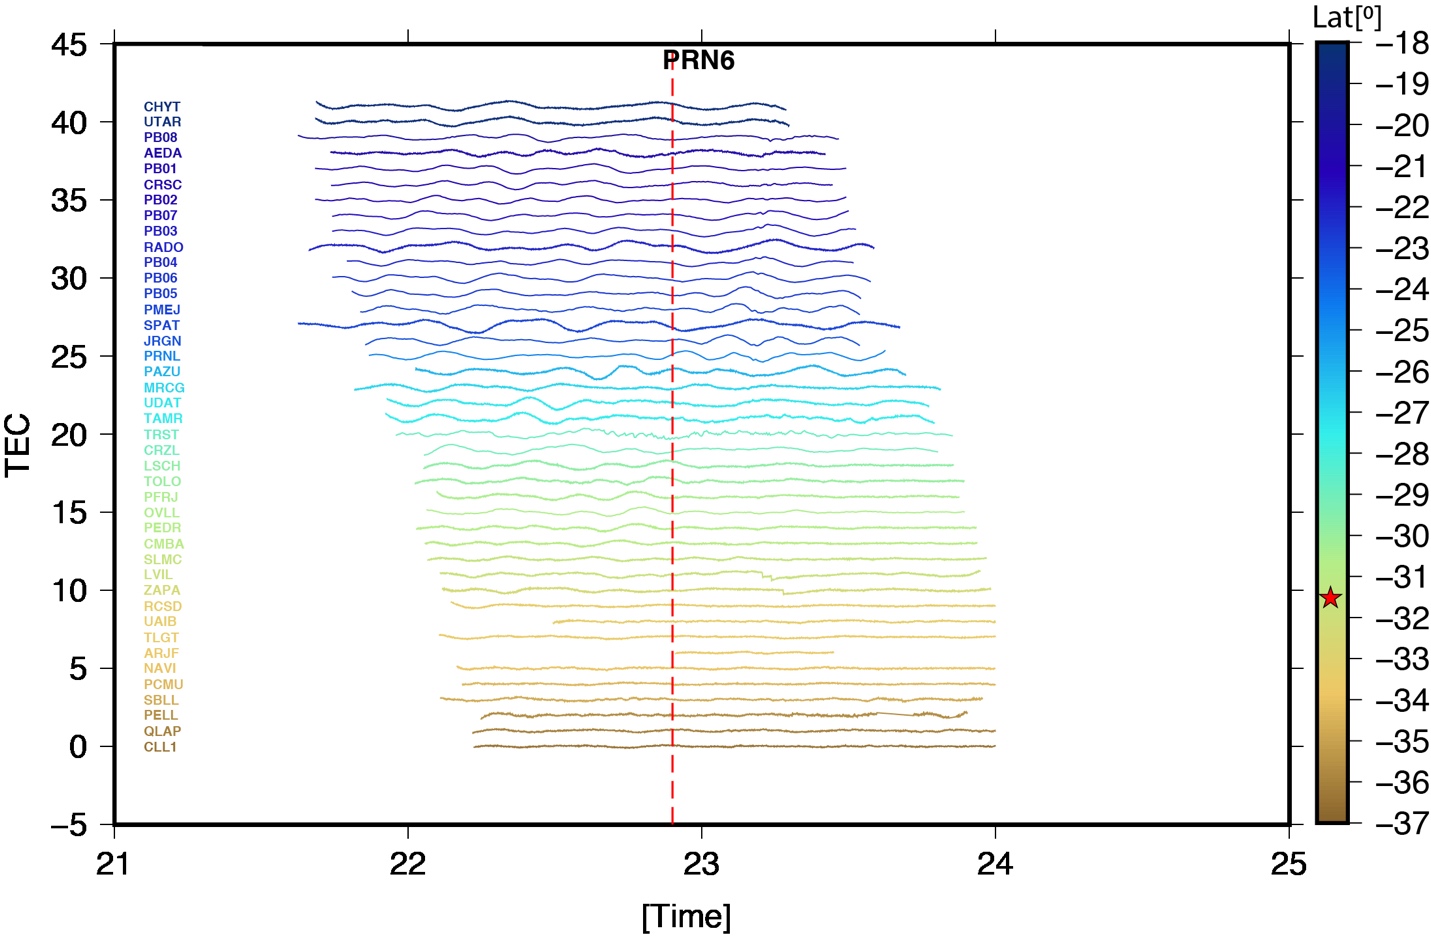


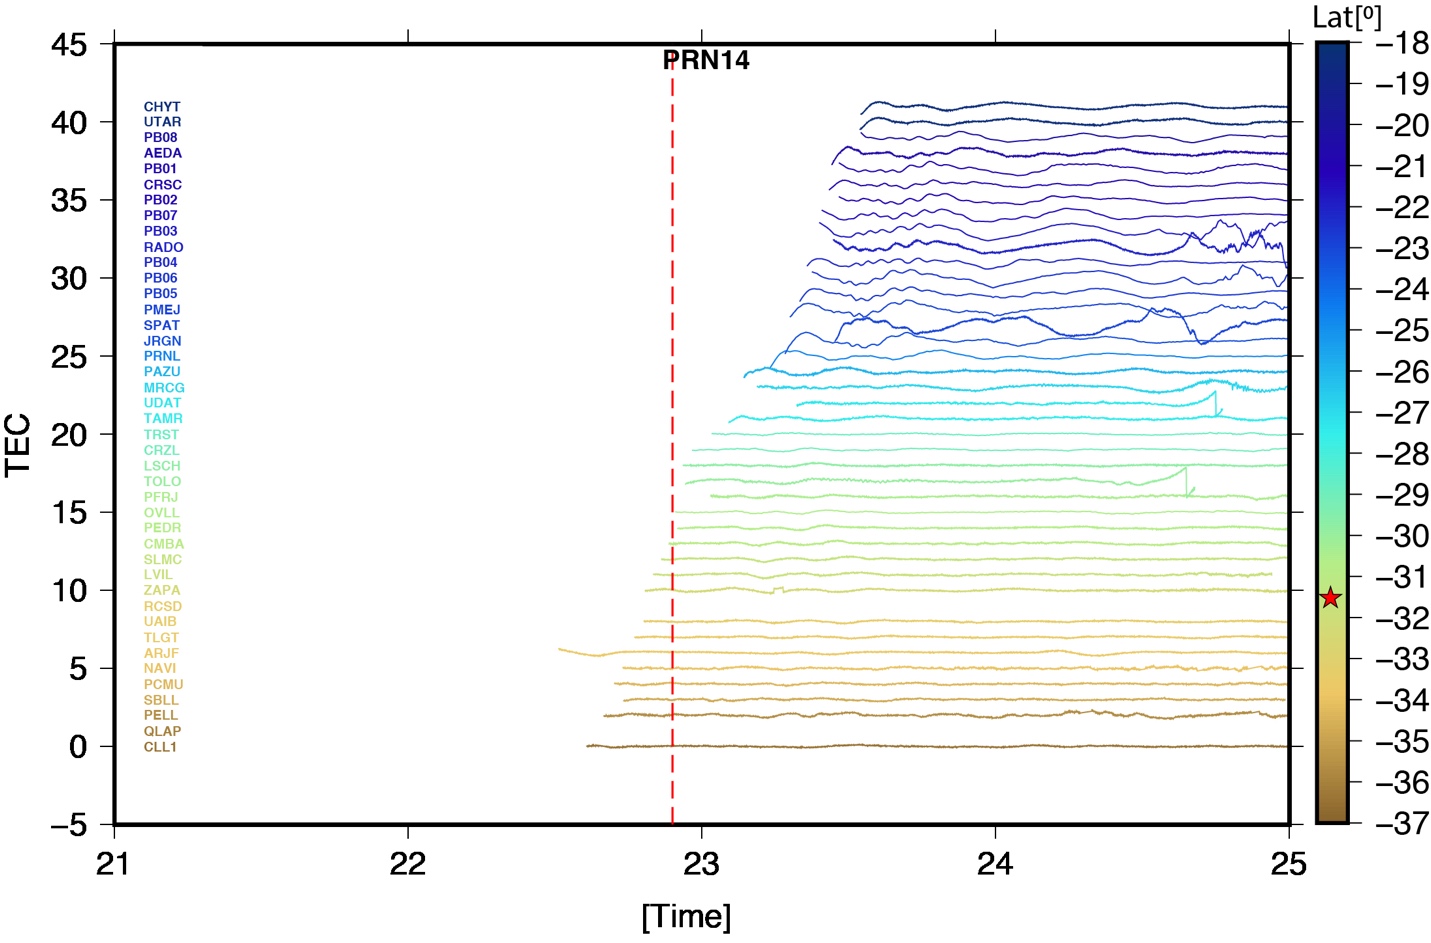


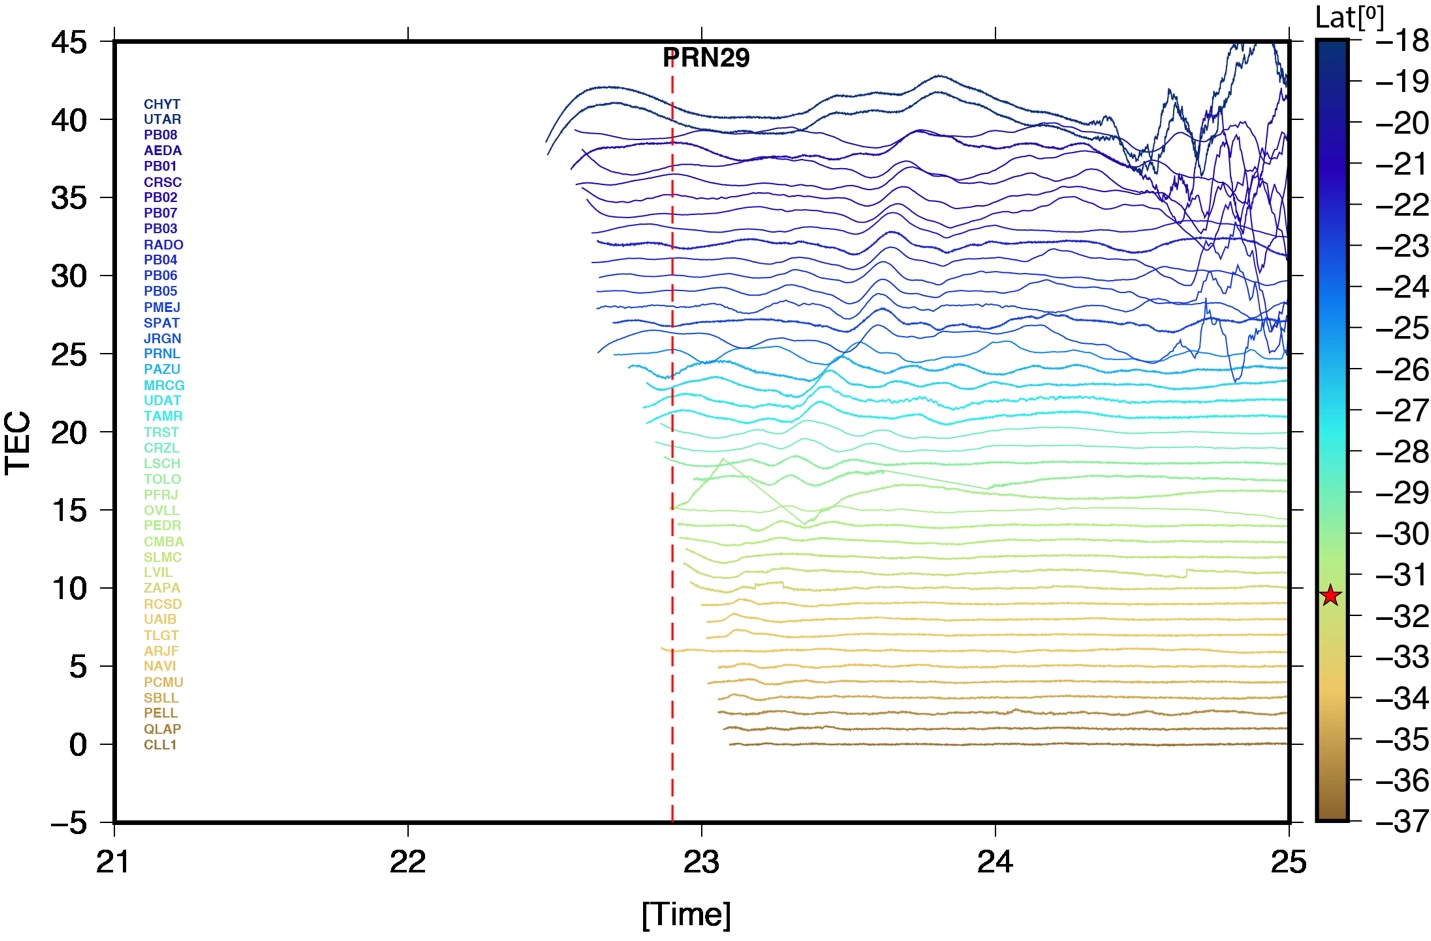


**Supplementary Figure S2.** VTEC of the Pisagua region of PRN 06, 14, 29 in the low elevation angle.

**Supplementary Figure S3:** Hodochrone map of Pisagua earthquake region of PRN 01,11,20 and 23.

**Supplementary Figure S4:** Hodochrone map of Illapel earthquake region of PRN 02,12,24 and 25.
